# Supplementary material
Source: PubMed Central journal article supplement (PMC2901511)

# Supporting Information for

## Fijiolides A and B, Inhibitors of TNF- $\alpha$ Induced NF $\kappa$ B Activation, from a Marine-Derived Sediment Bacterium of the Genus *Nocardiopsis*.

Sang-Jip Nam,<sup>†</sup> Susana P. Gaudêncio, Christopher A. Kauffman,<sup>†</sup> Paul R. Jensen,<sup>†</sup> Tamara P.  
Kondratyuk,<sup>‡</sup> Laura E. Marler,<sup>‡</sup> John M. Pezzuto,<sup>‡</sup> and William Fenical <sup>\*,†</sup>

<sup>†</sup>*Center for Marine Biotechnology and Biomedicine, Scripps Institution of Oceanography,  
University of California, San Diego, La Jolla, CA92093-0204*

<sup>‡</sup>*College of Pharmacy, University of Hawaii at Hilo, Hilo, Hawaii 96720*

# Table of Contents

|                                                                                                                                          |     |
|------------------------------------------------------------------------------------------------------------------------------------------|-----|
| <b>Figure S1.</b> $^1\text{H}$ NMR Spectrum (600 MHz) of Fijiolide A in $\text{DMSO-}d_6$ .....                                          | S2  |
| <b>Figure S2.</b> $^{13}\text{C}$ NMR Spectrum (125 MHz) of Fijiolide A in $\text{DMSO-}d_6$ .....                                       | S3  |
| <b>Figure S3.</b> COSY Spectra (600 MHz) of Fijiolide A in $\text{DMSO-}d_6$ .....                                                       | S4  |
| <b>Figure S4.</b> HSQC Spectra (600 MHz) of Fijiolide A in $\text{DMSO-}d_6$ .....                                                       | S5  |
| <b>Figure S5.</b> HMBC Spectra (600 MHz) of Fijiolide A in $\text{DMSO-}d_6$ .....                                                       | S6  |
| <b>Figure S6.</b> NOESY Spectra (600 MHz) of Fijiolide A in $\text{DMSO-}d_6$ .....                                                      | S7  |
| <b>Figure S7.</b> $^1\text{H}$ NMR Spectrum (600 MHz) of Fijiolide B in $\text{DMSO-}d_6$ .....                                          | S8  |
| <b>Figure S8.</b> $^1\text{H}$ NMR Spectrum (600 MHz) for <i>bis-S</i> -MTPA ester ( <b>3a</b> ) of Fijiolide A in methanol- $d_4$ ..... | S9  |
| <b>Figure S9.</b> $^1\text{H}$ NMR Spectrum (600 MHz) for <i>bis-R</i> -MTPA ester ( <b>3b</b> ) of Fijiolide A in methanol- $d_4$ ..... | S10 |
| <b>Figure S10.</b> $^1\text{H}$ NMR Spectrum (600 MHz) of <i>S</i> -MTPA amide ( <b>4a</b> ) of Fijiolide B in $\text{DMSO-}d_6$ .....   | S11 |
| <b>Figure S11.</b> $^1\text{H}$ NMR Spectrum (600 MHz) of <i>R</i> -MTPA amide ( <b>4b</b> ) of Fijiolide B in $\text{DMSO-}d_6$ .....   | S12 |
| <b>Figure S12.</b> $^1\text{H}$ NMR Spectrum (500 MHz) for Acetonide ( <b>5</b> ) in methanol- $d_4$ .....                               | S13 |
| <b>Figure S13.</b> $^1\text{H}$ NMR Spectrum (600 MHz) for <i>S</i> -MTPA ester ( <b>6a</b> ) of Acetonide in $\text{CDCl}_3$ .....      | S14 |
| <b>Figure S14.</b> $^1\text{H}$ NMR Spectrum (600 MHz) for <i>R</i> -MTPA ester ( <b>6b</b> ) of Acetonide in $\text{CDCl}_3$ .....      | S15 |

**Figure S1.**  $^1\text{H}$  NMR Spectrum (600 MHz) of Fijiolide A in  $\text{DMSO-}d_6$

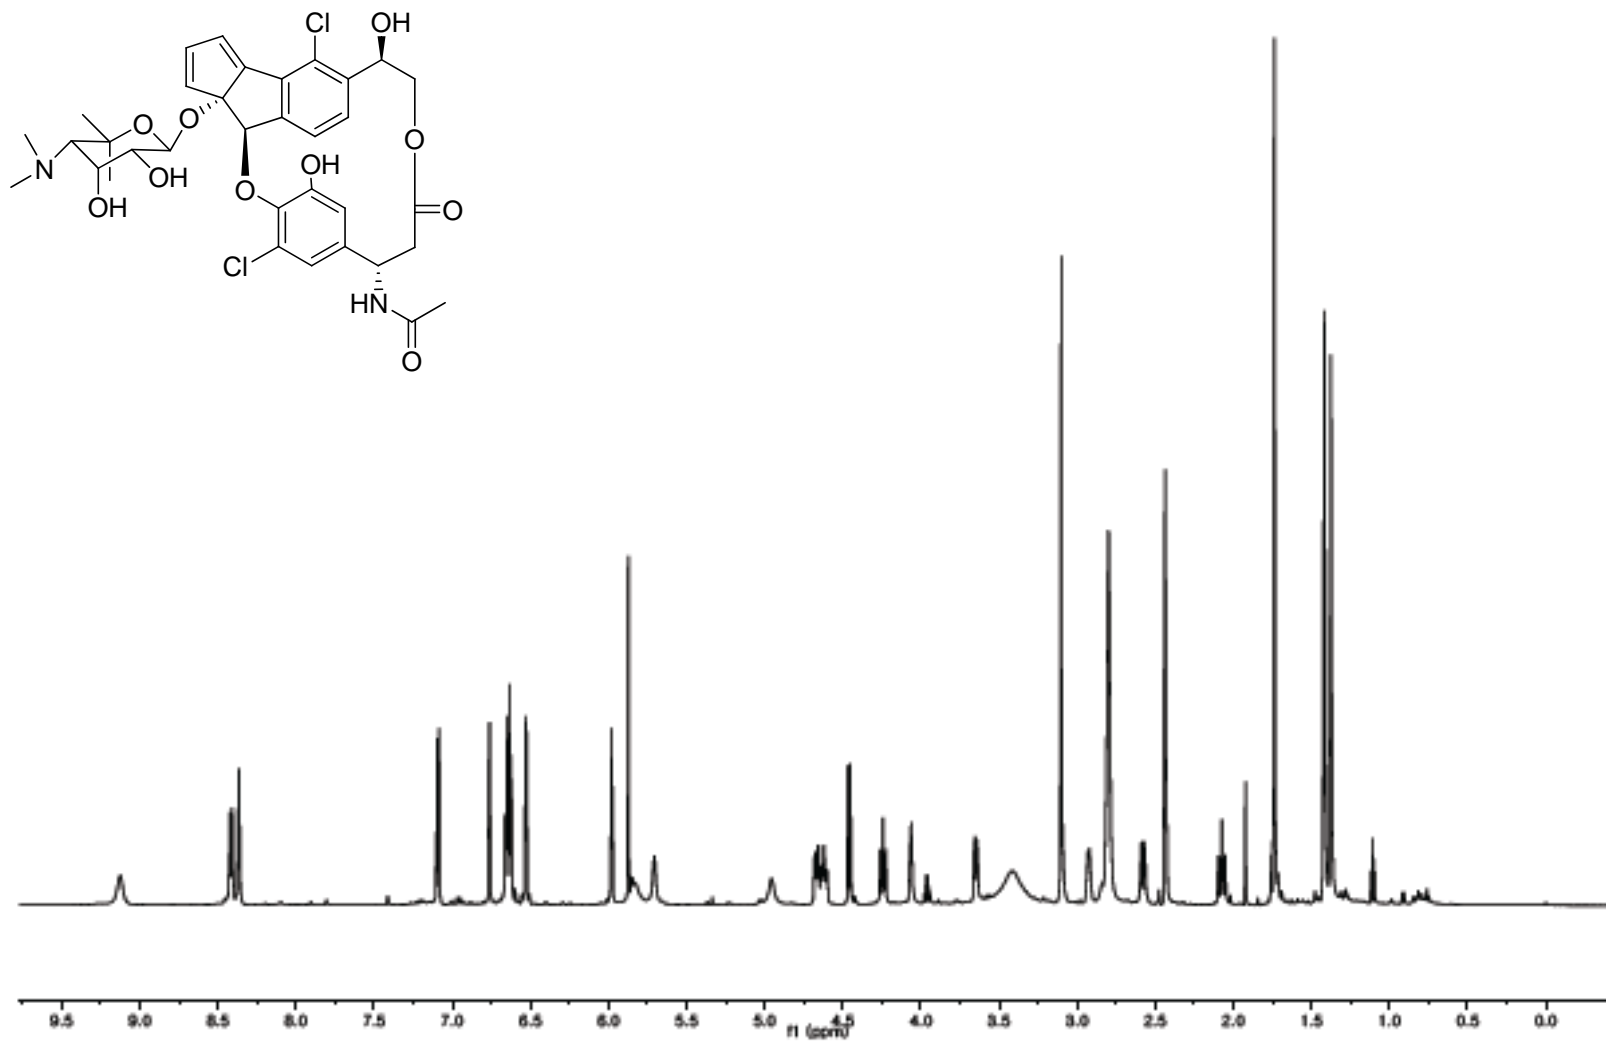

**Figure S2.**  $^{13}\text{C}$  NMR Spectrum (125 MHz) of Fijiolide A in  $\text{DMSO-}d_6$

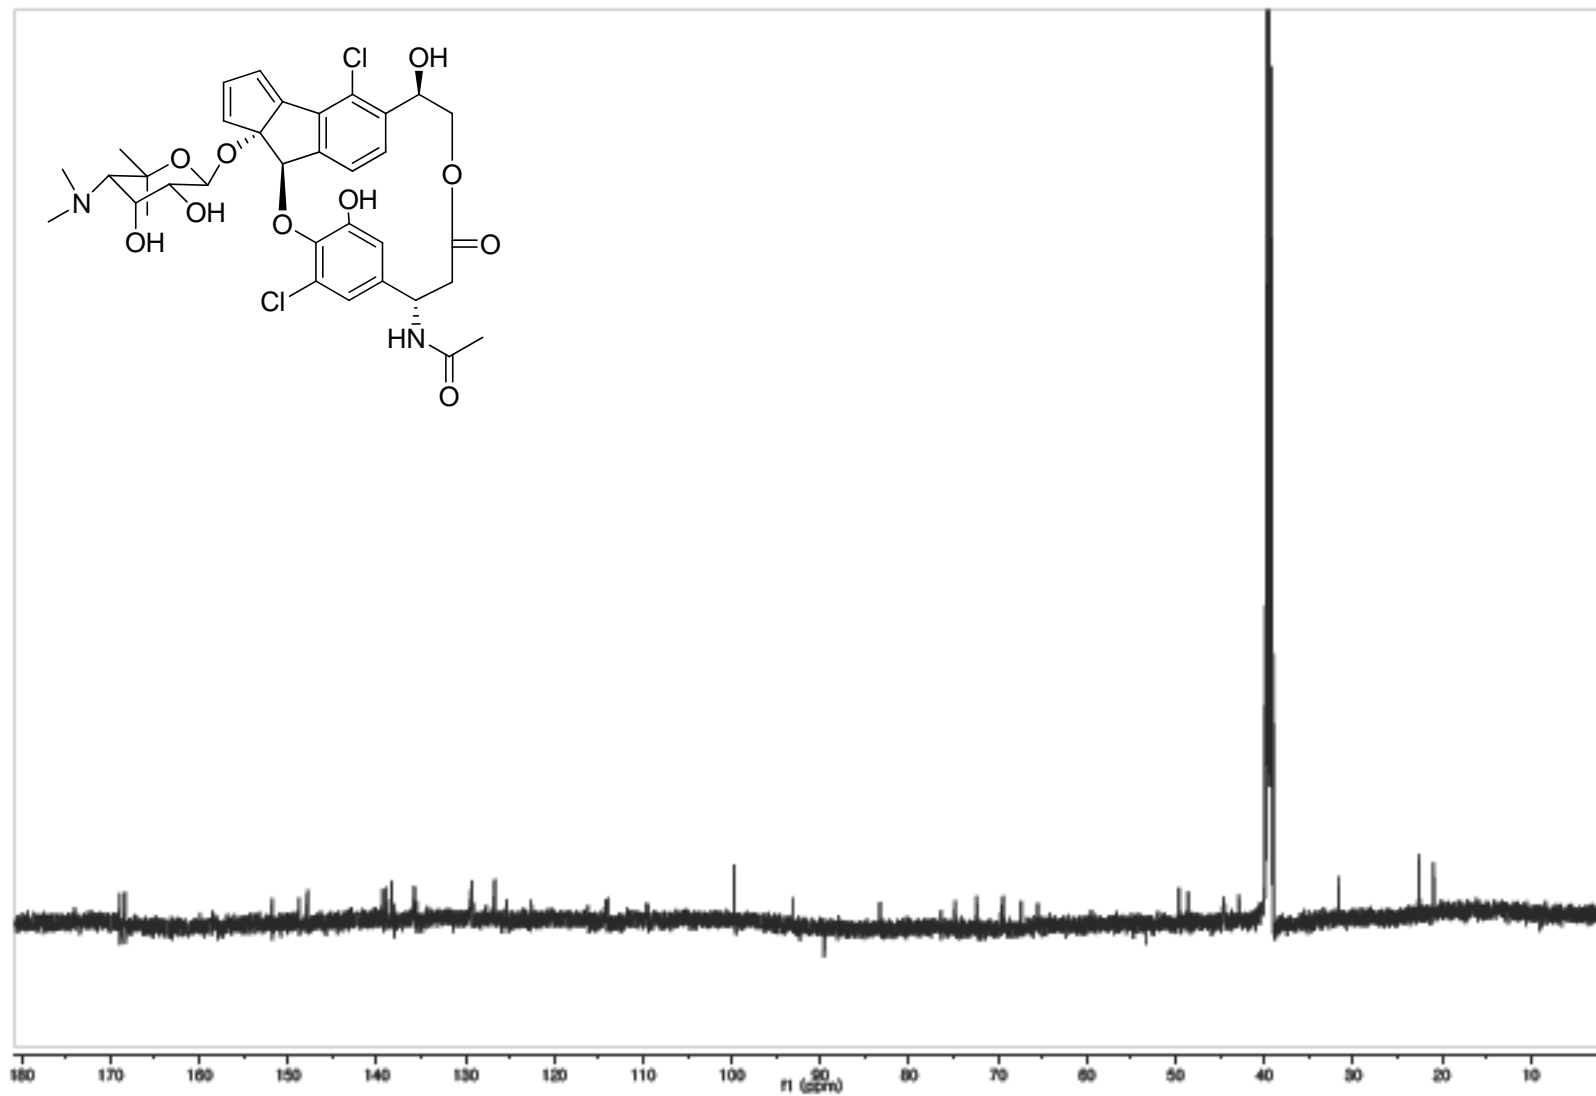

**Figure S3.** COSY Spectra (600 MHz) of Fijiolide A in DMSO- $d_6$

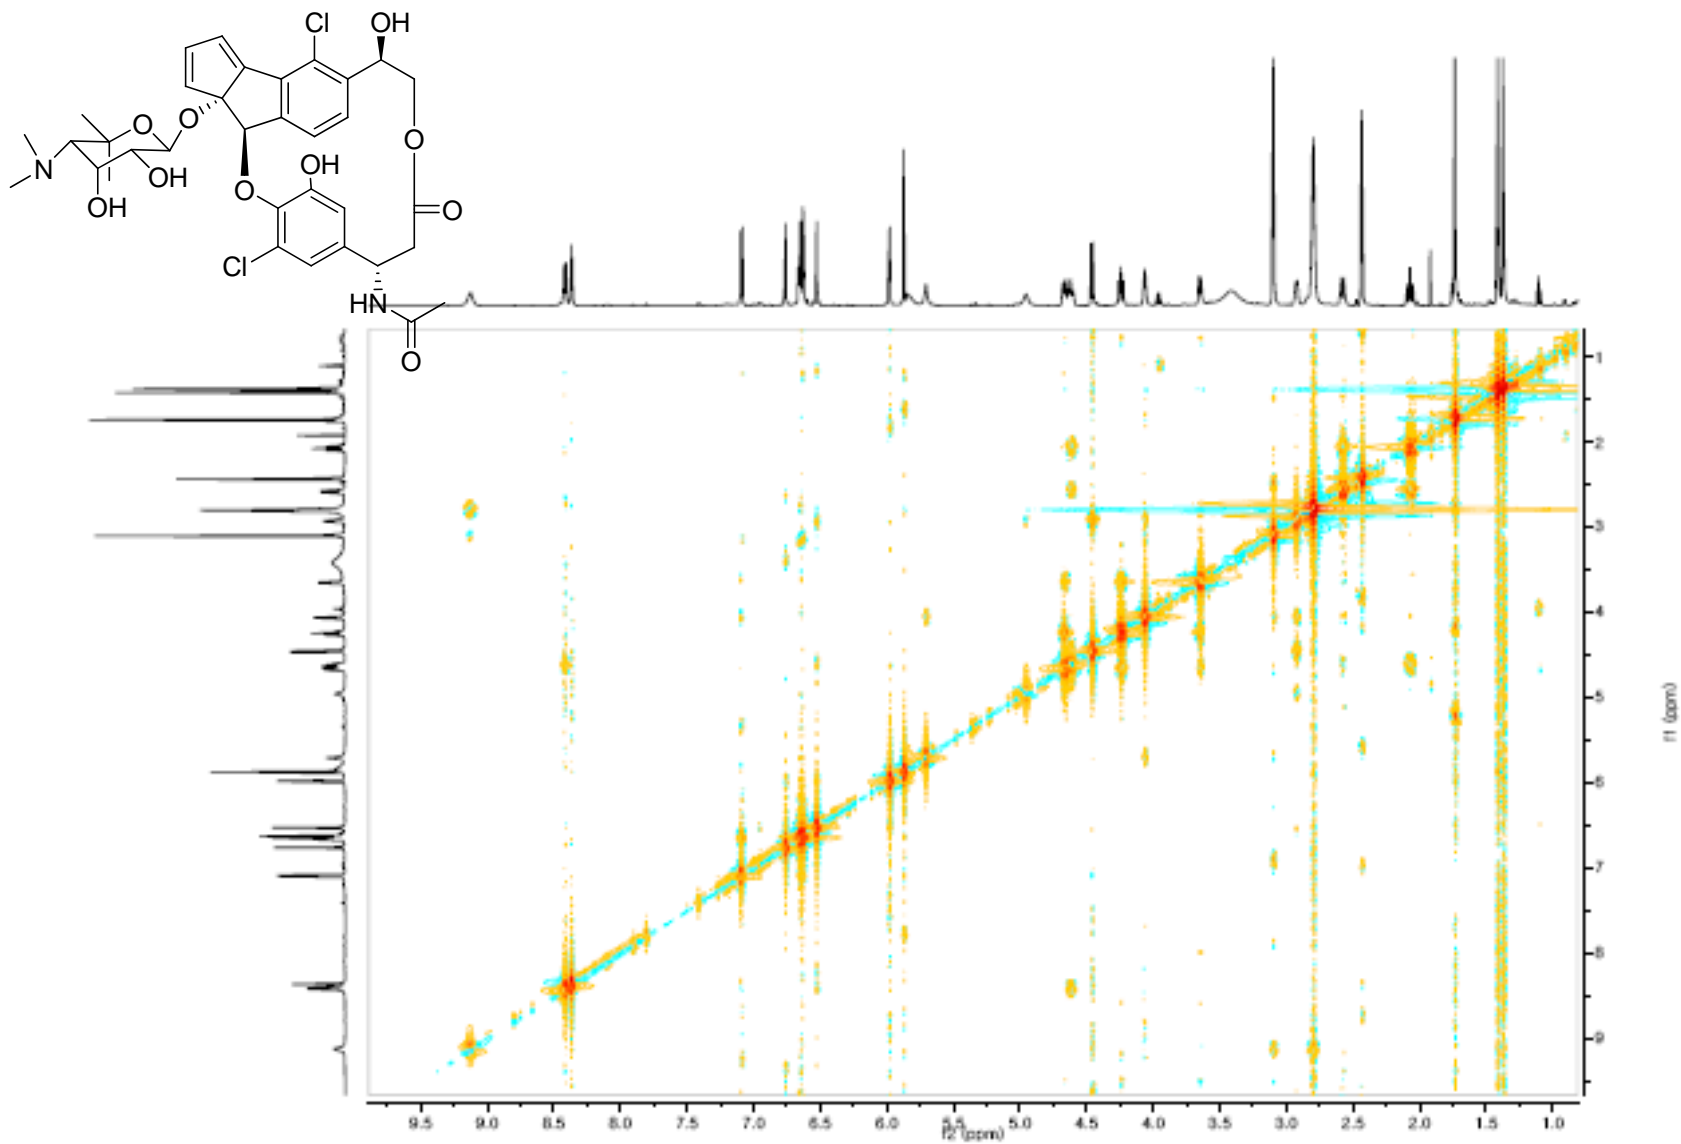

**Figure S4.** HSQC Spectra (600 MHz) of Fijiolide A in DMSO- $d_6$

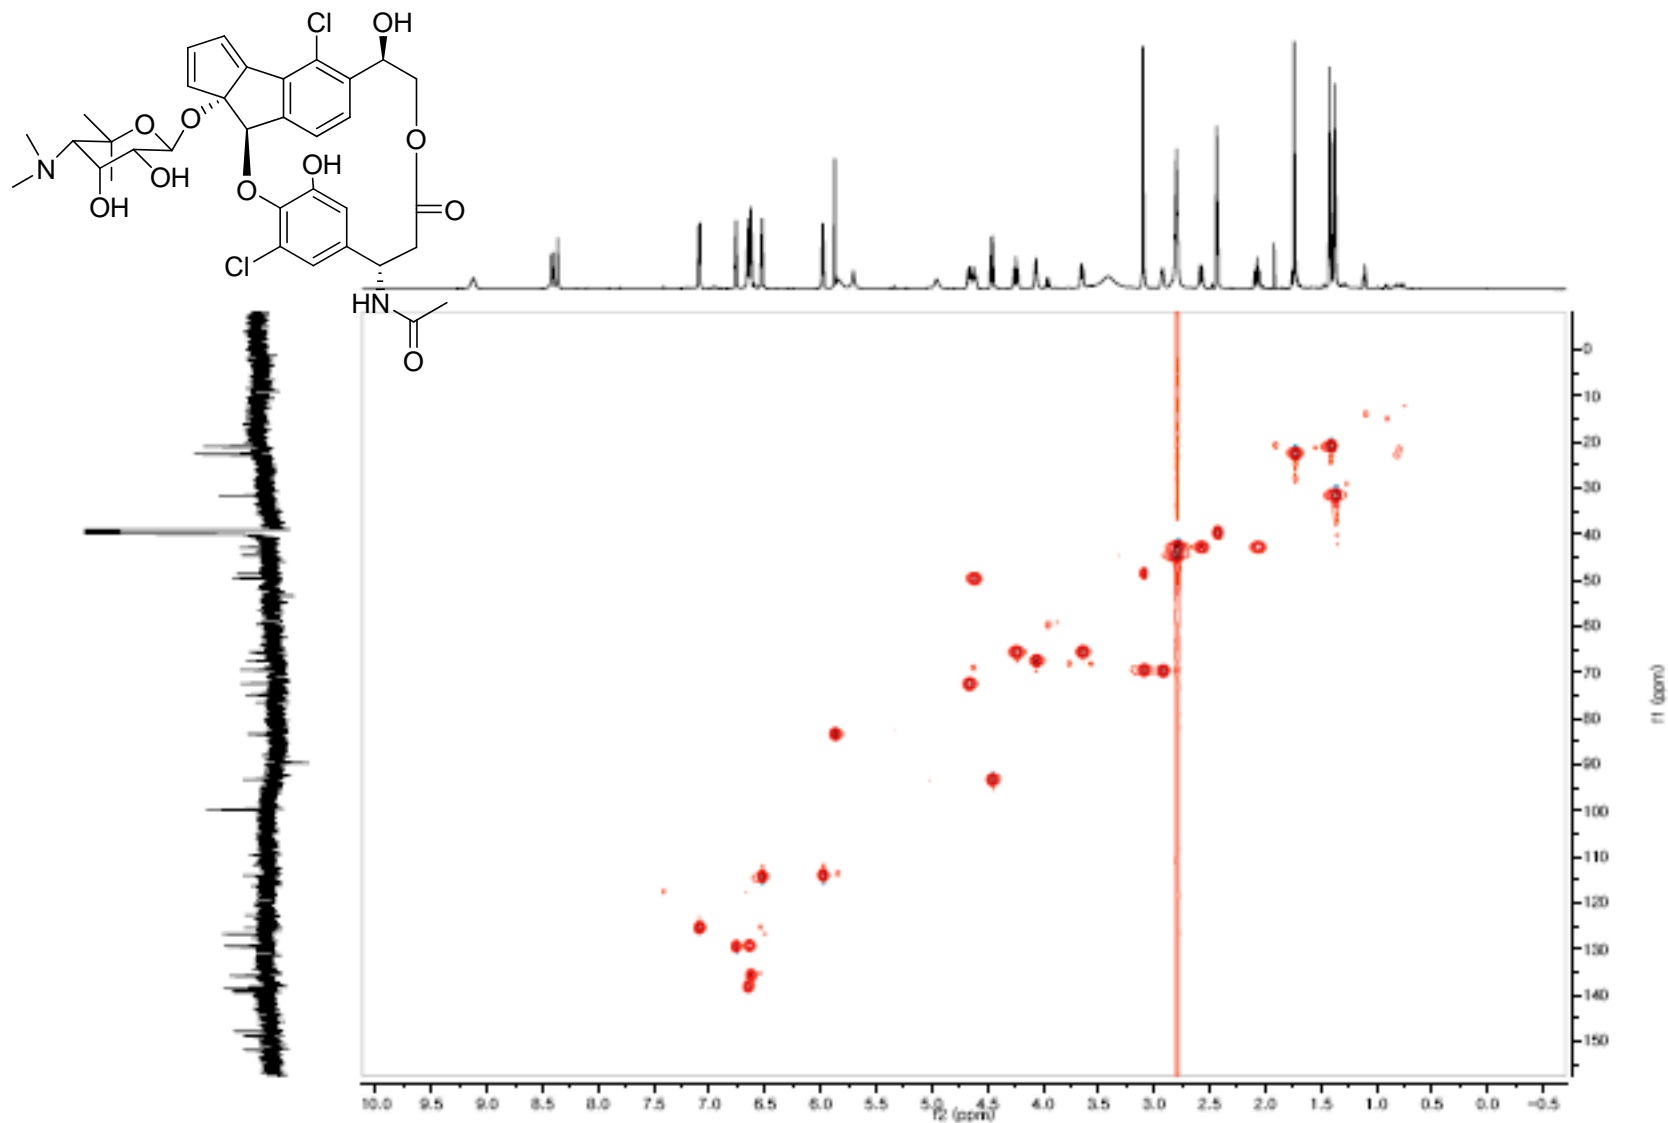

**Figure S5.** HMBC Spectra (600 MHz) of Fijiolide A in DMSO- $d_6$

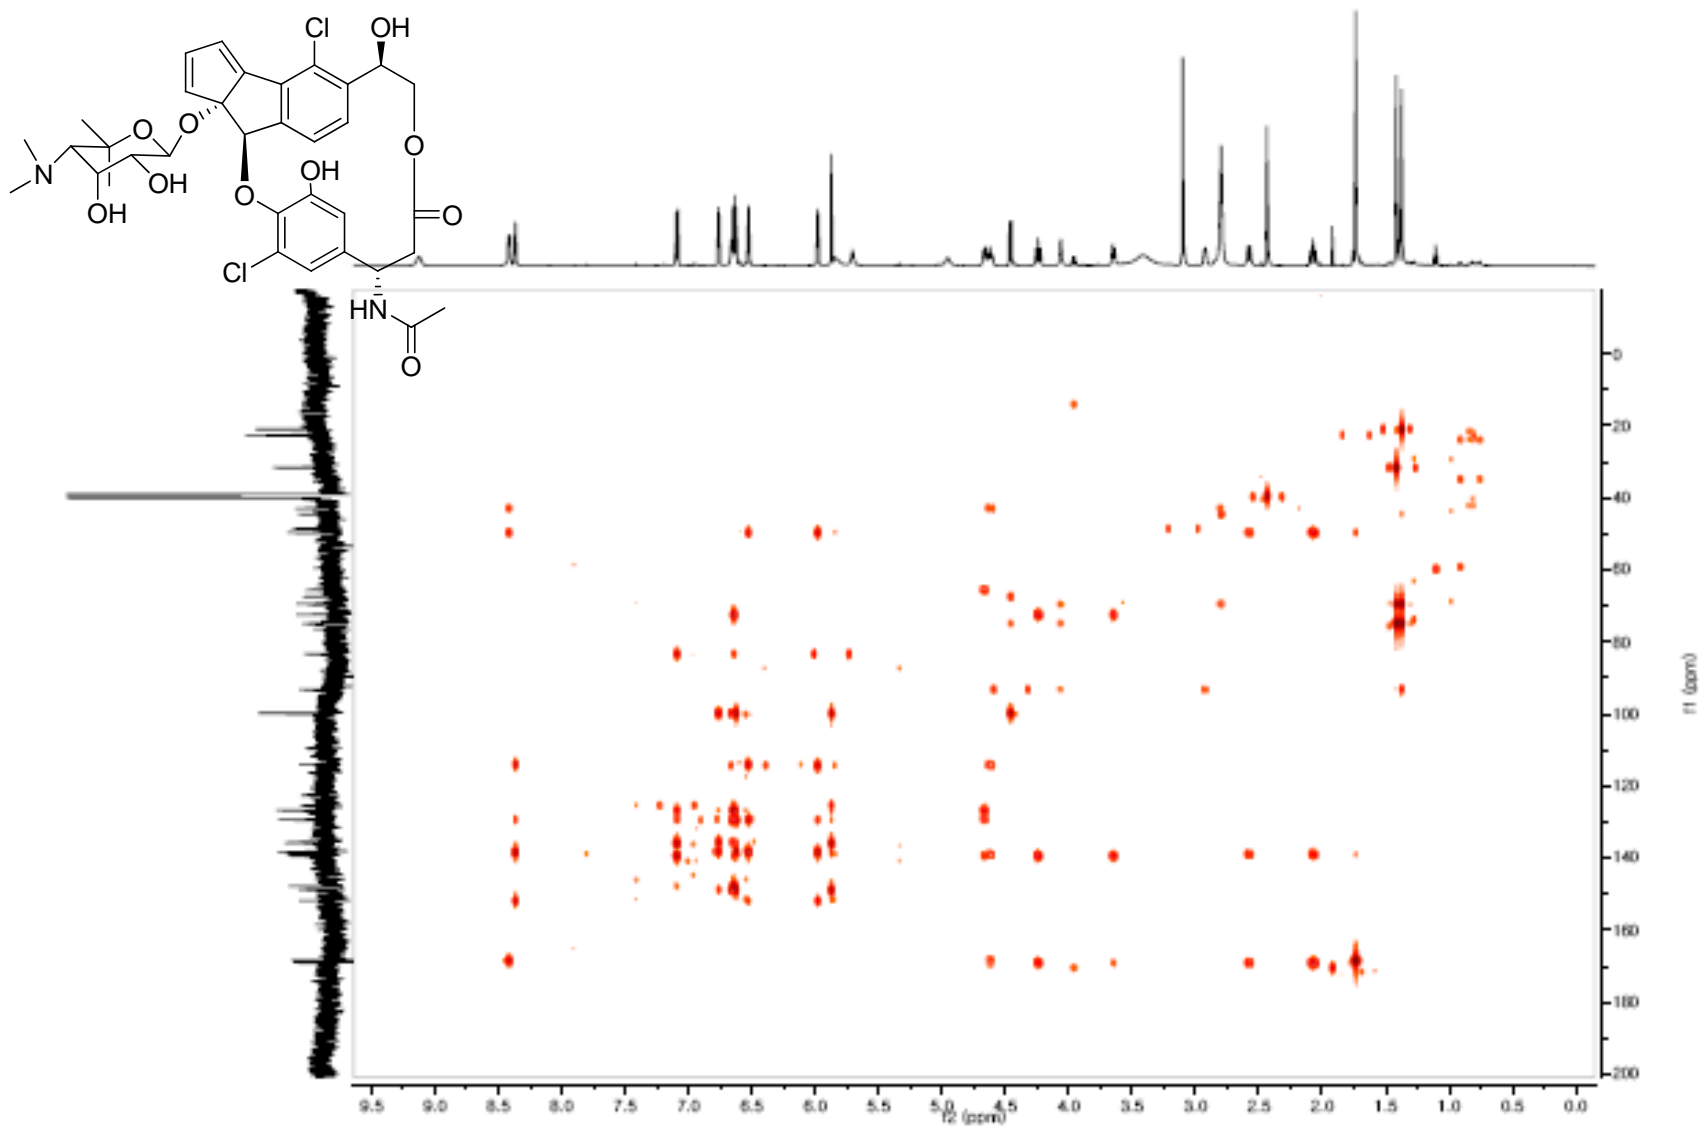

**Figure S6.** NOESY Spectra (600 MHz) of Fijiolide A in DMSO- $d_6$

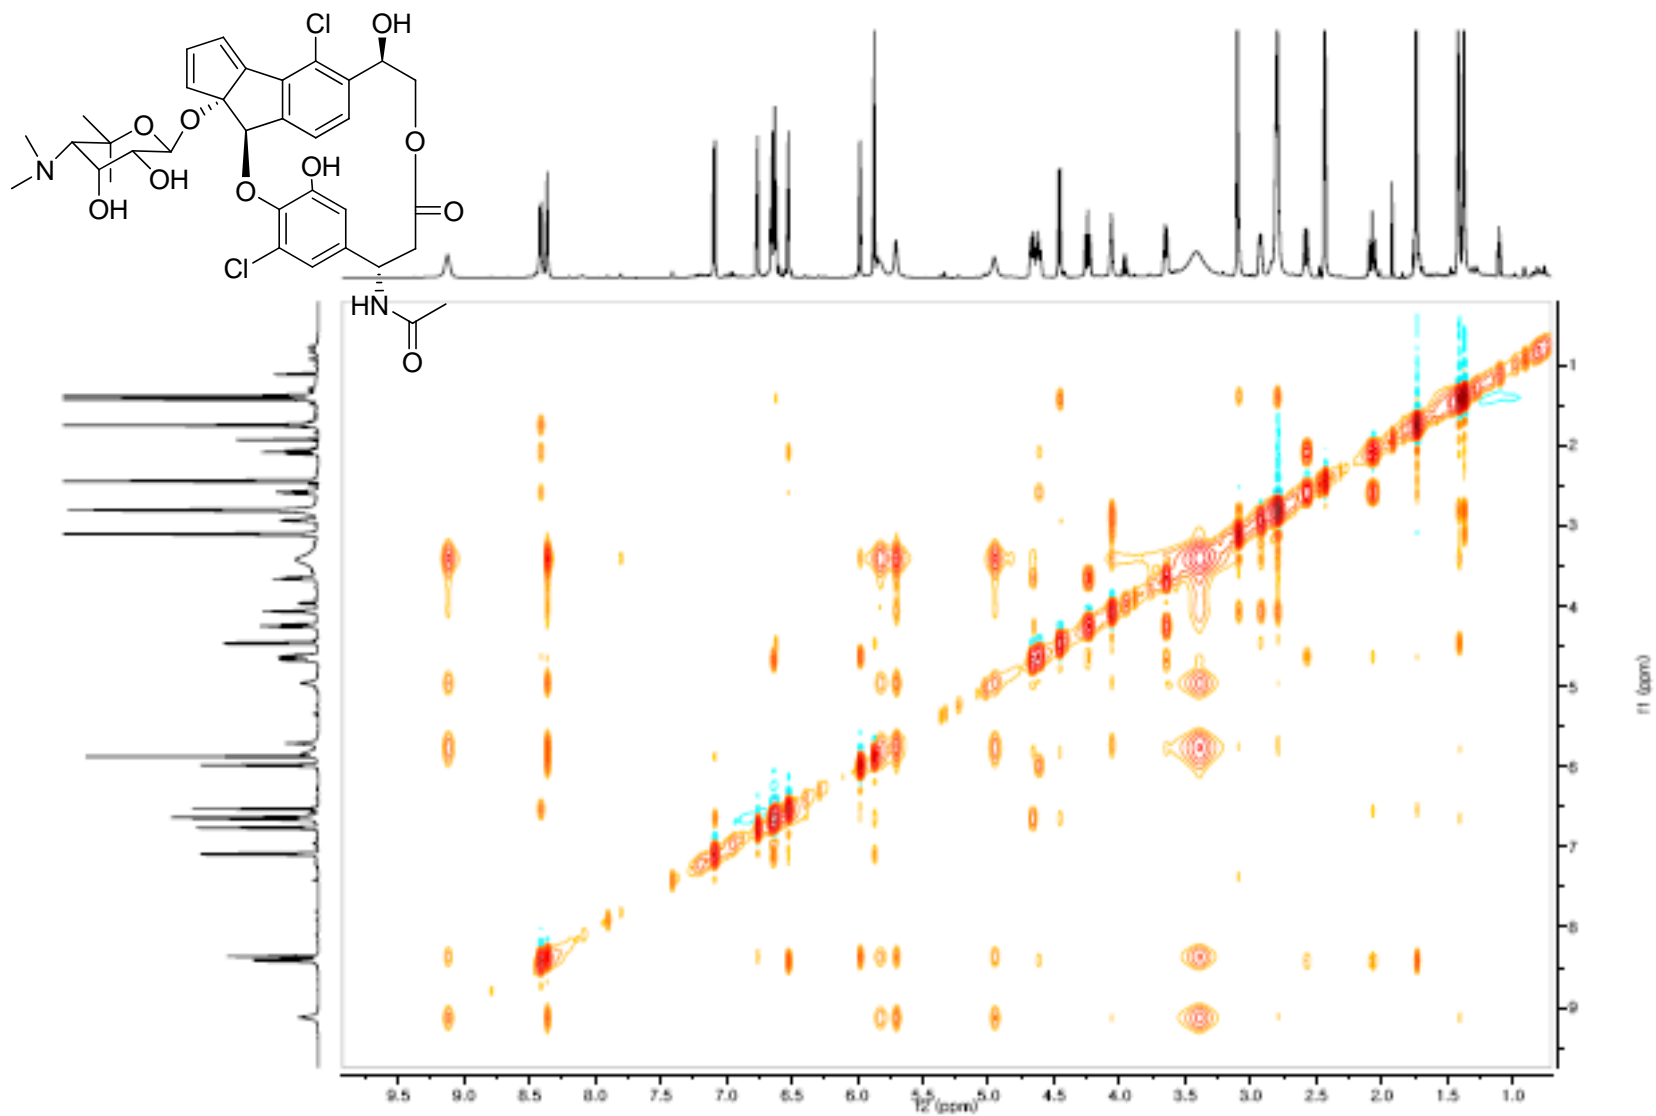



**Figure S7.**  $^1\text{H}$  NMR Spectrum (600 MHz) of Fijiolide B in  $\text{DMSO-}d_6$

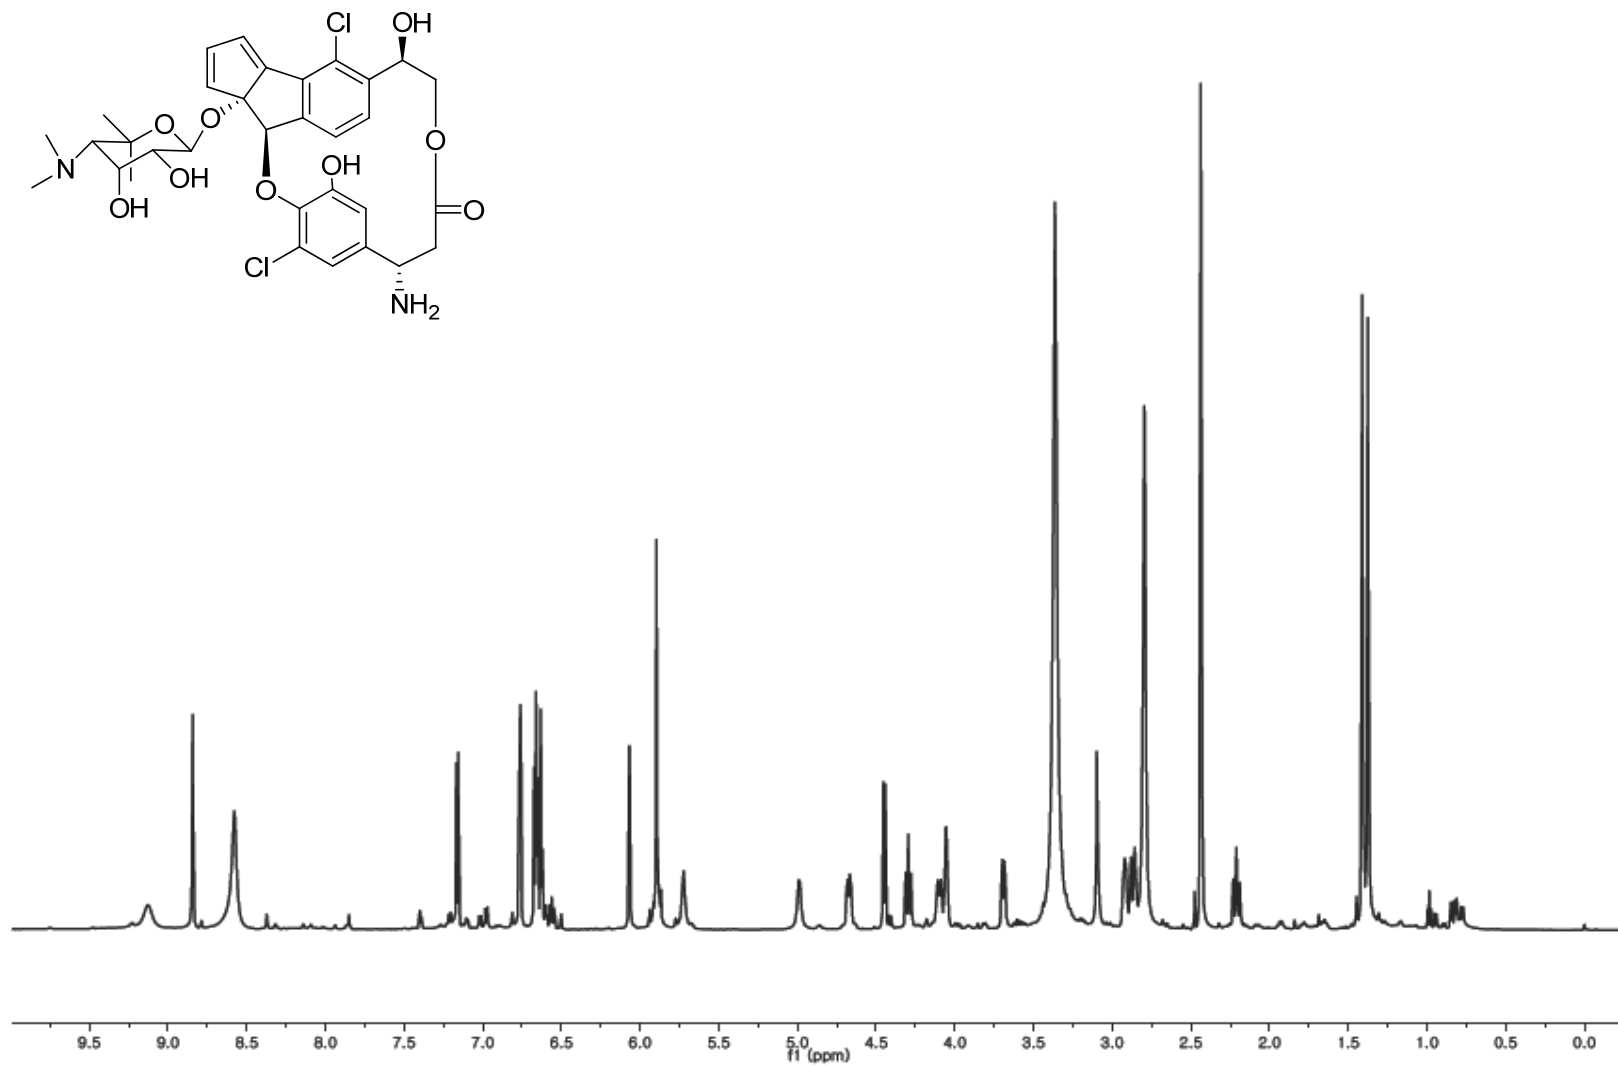

**Figure S8.**  $^1\text{H}$  NMR Spectrum (600 MHz) for *bis*-*S*-MTPA ester (**3a**) of Fijiolide A in methanol- $d_4$

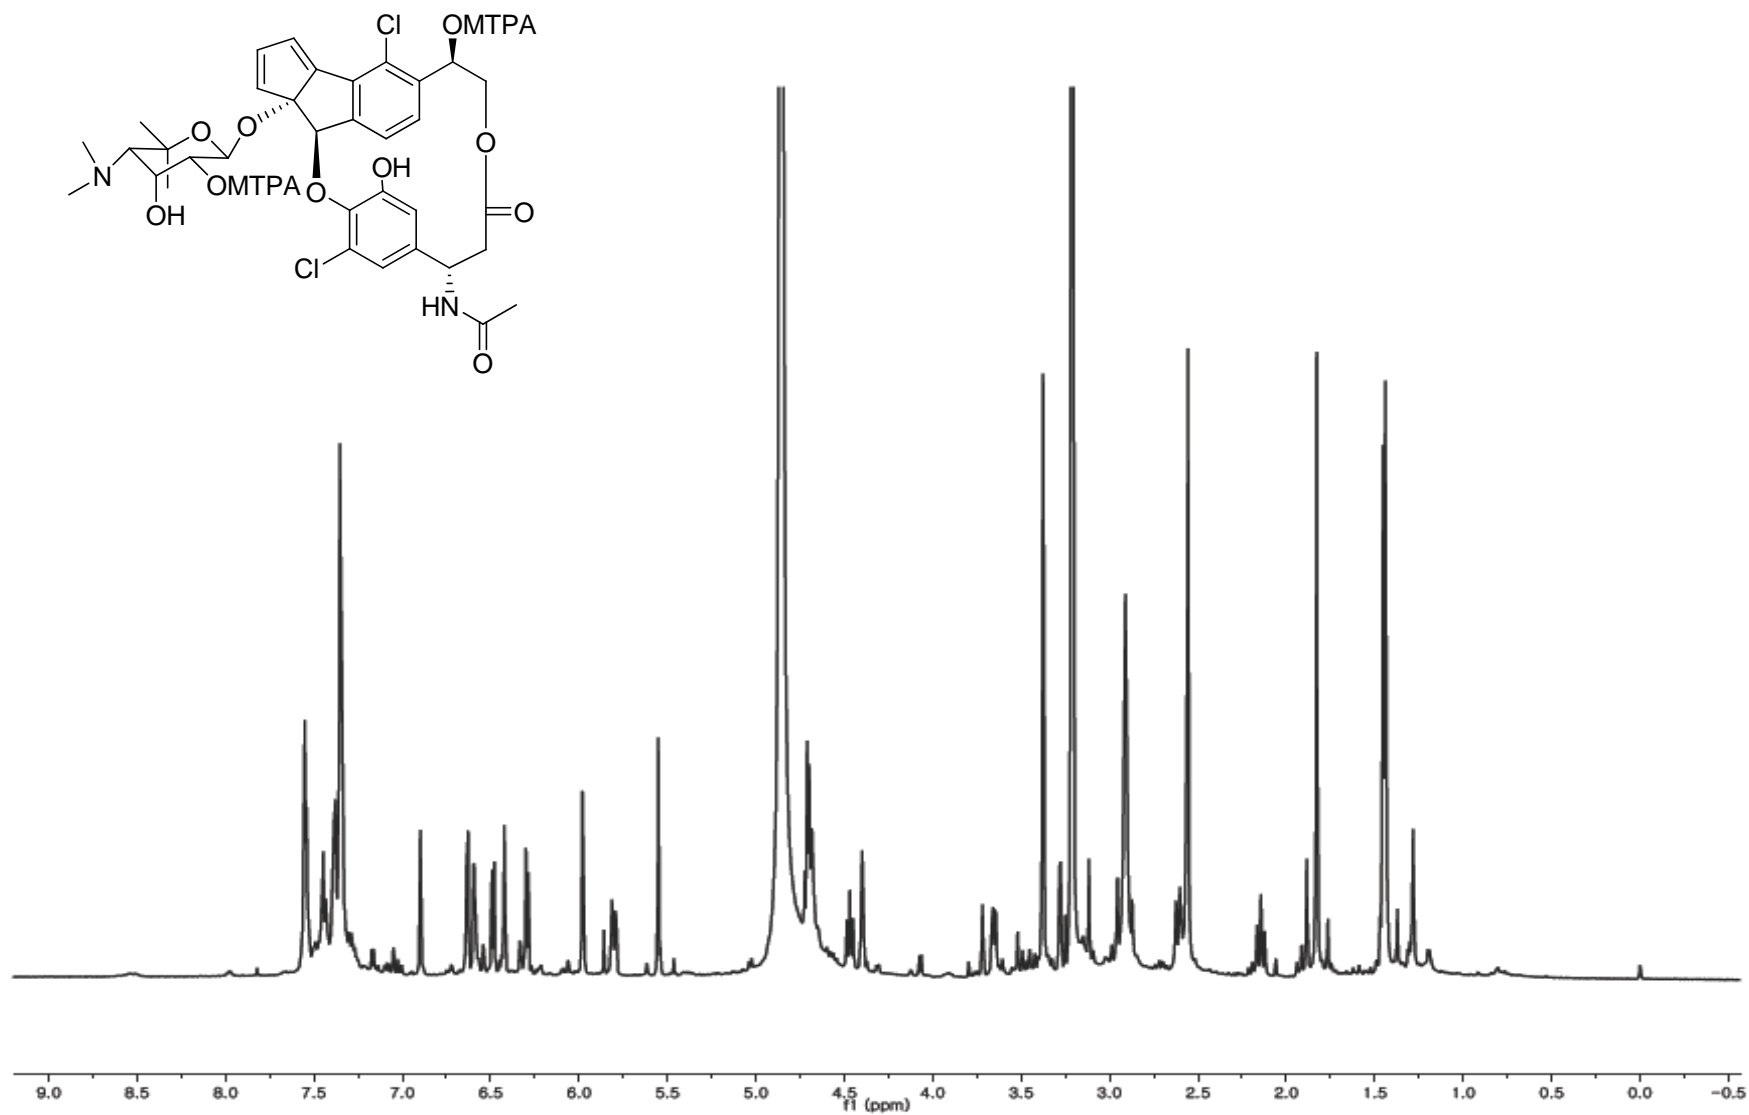

**Figure S9.**  $^1\text{H}$  NMR Spectrum (600 MHz) for *bis-R*-MTPA ester (**3b**) of Fijiolide A in methanol- $d_4$

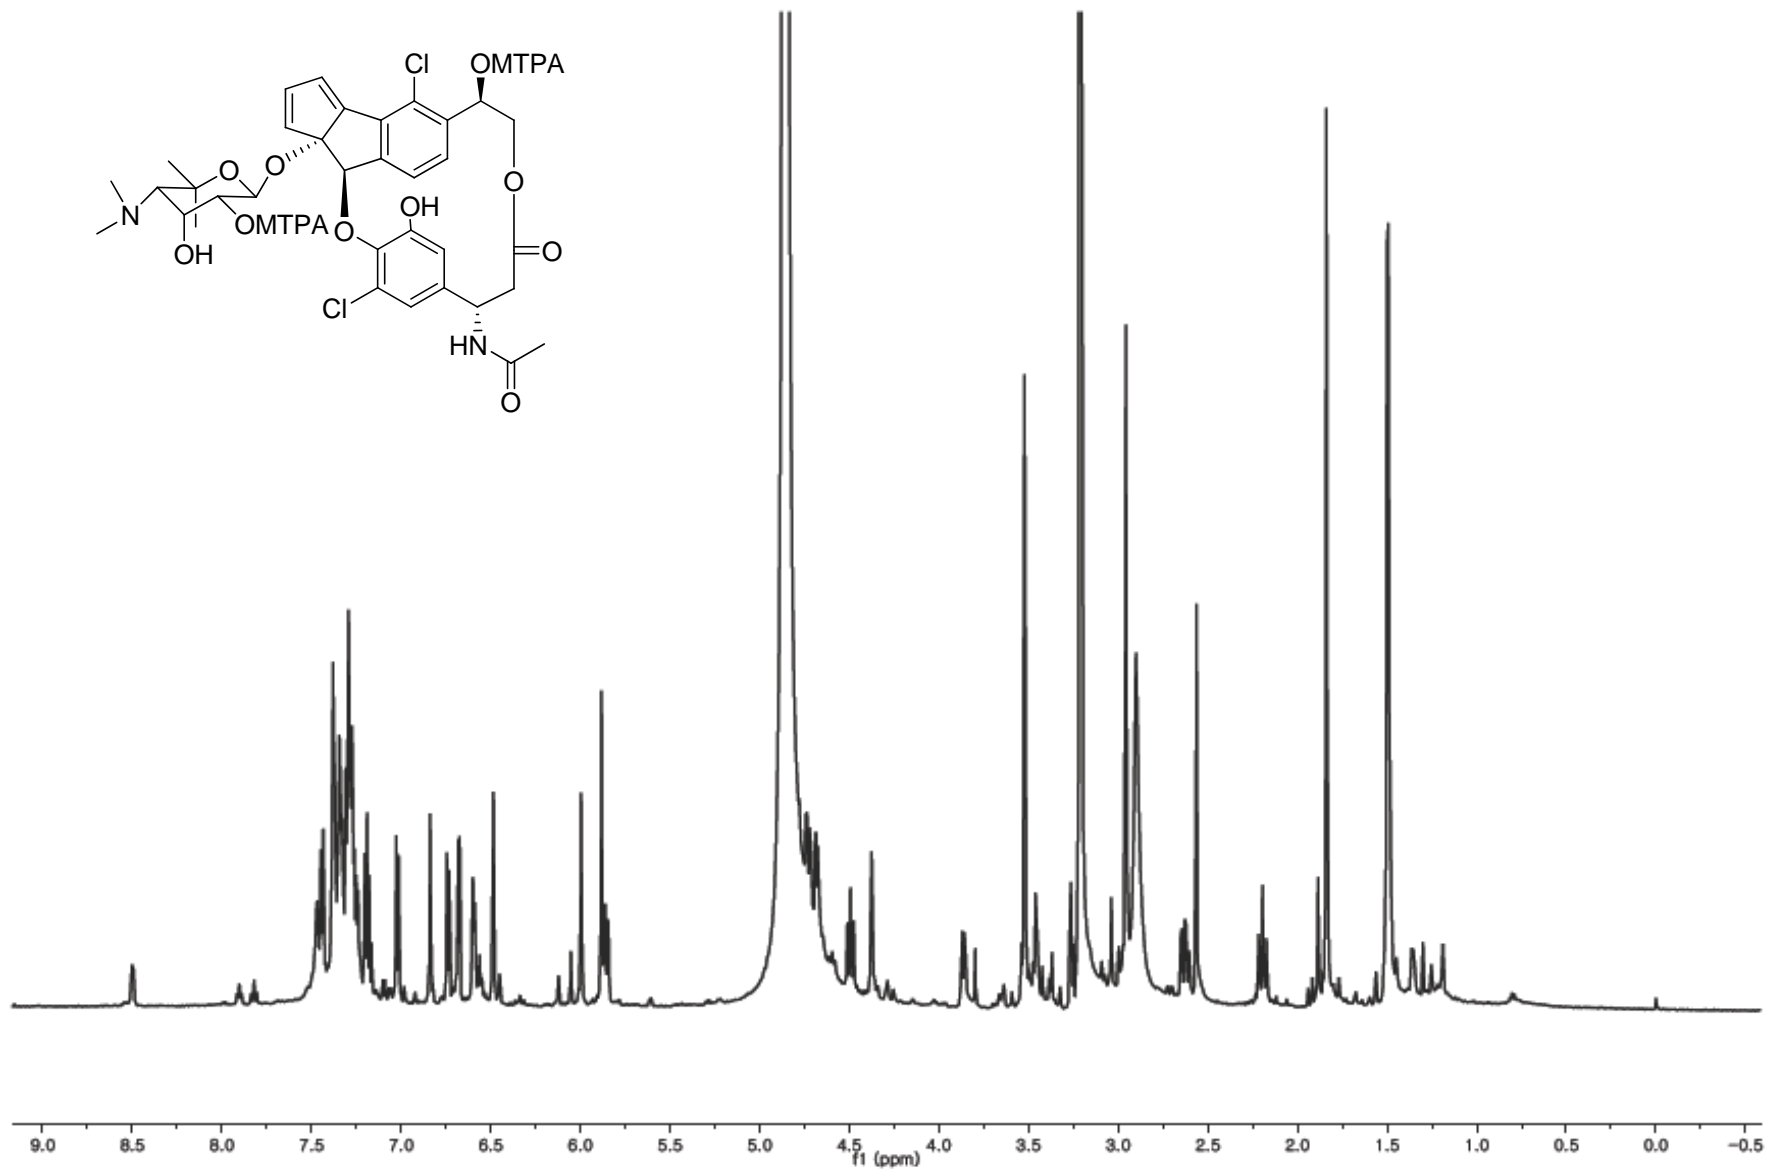

**Figure S10.**  $^1\text{H}$  NMR Spectrum (600 MHz) of *S*-MTPA amide (**4a**) of Fijiolide B in  $\text{DMSO-}d_6$

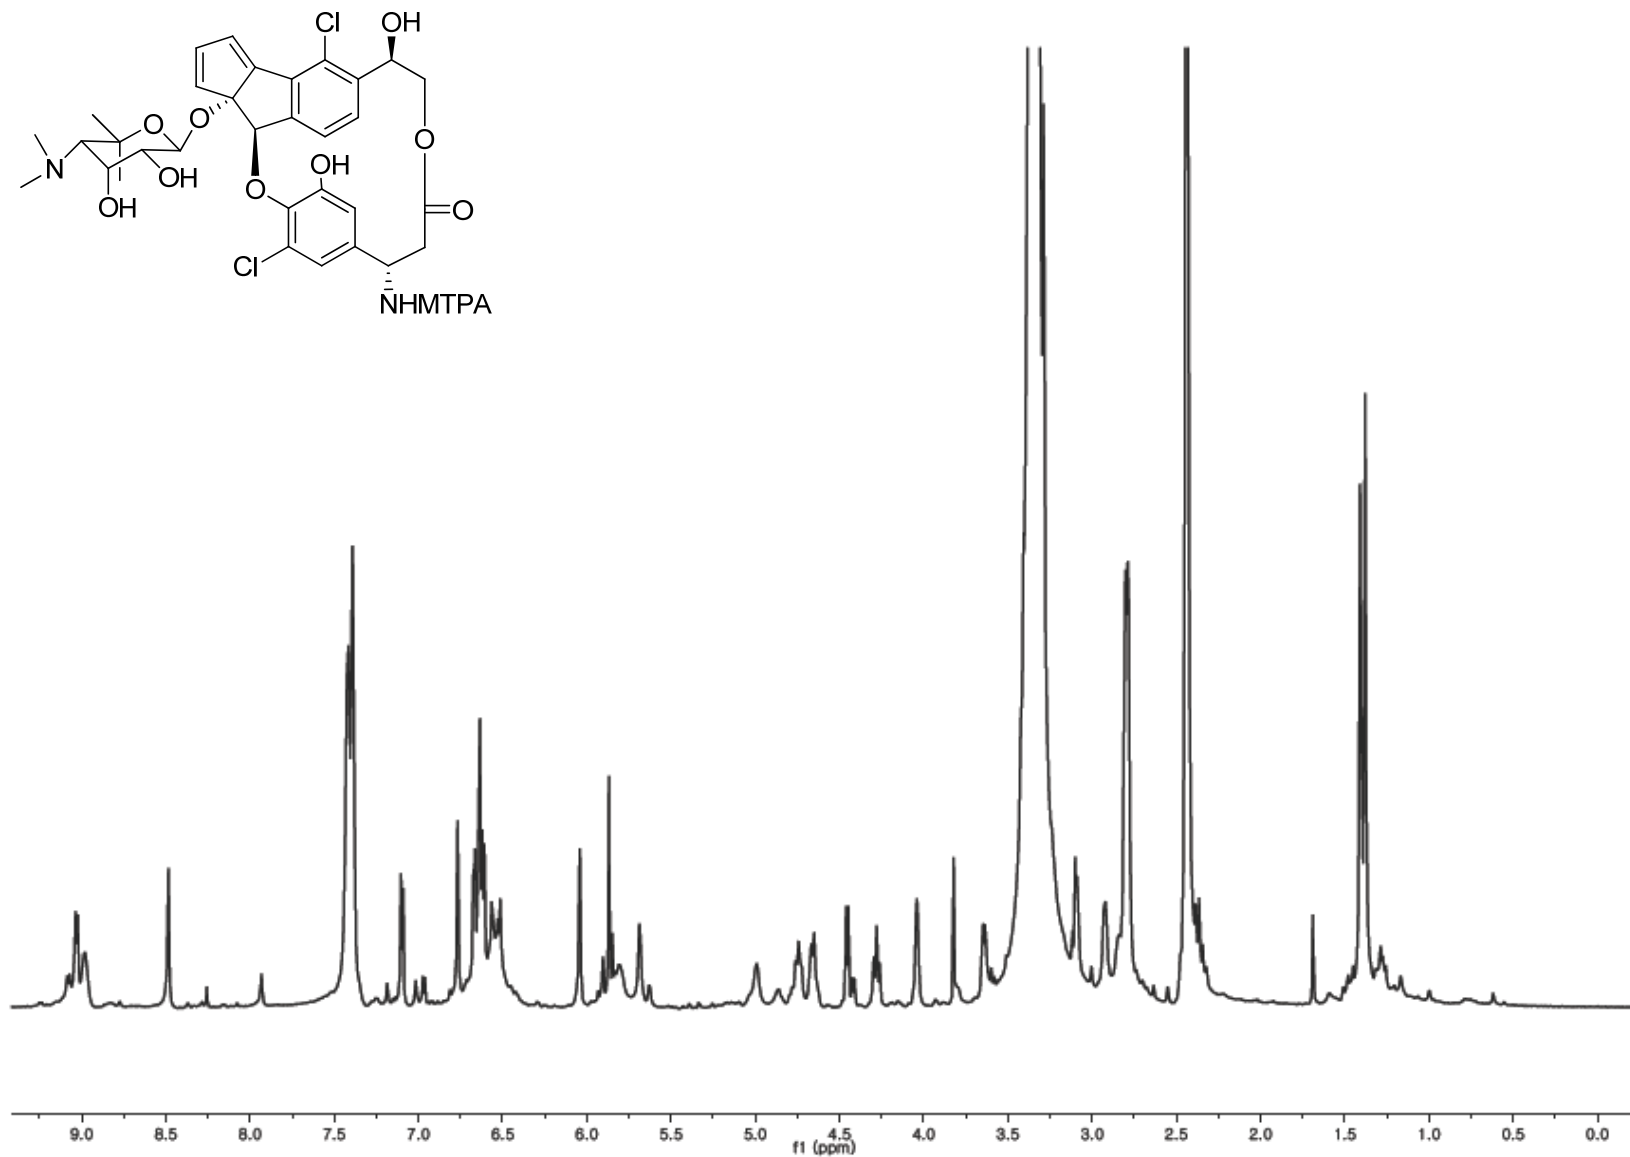

**Figure S11.**  $^1\text{H}$  NMR Spectrum (600 MHz) of *R*-MTPA amide (**4b**) of Fijiolide B in  $\text{DMSO-}d_6$

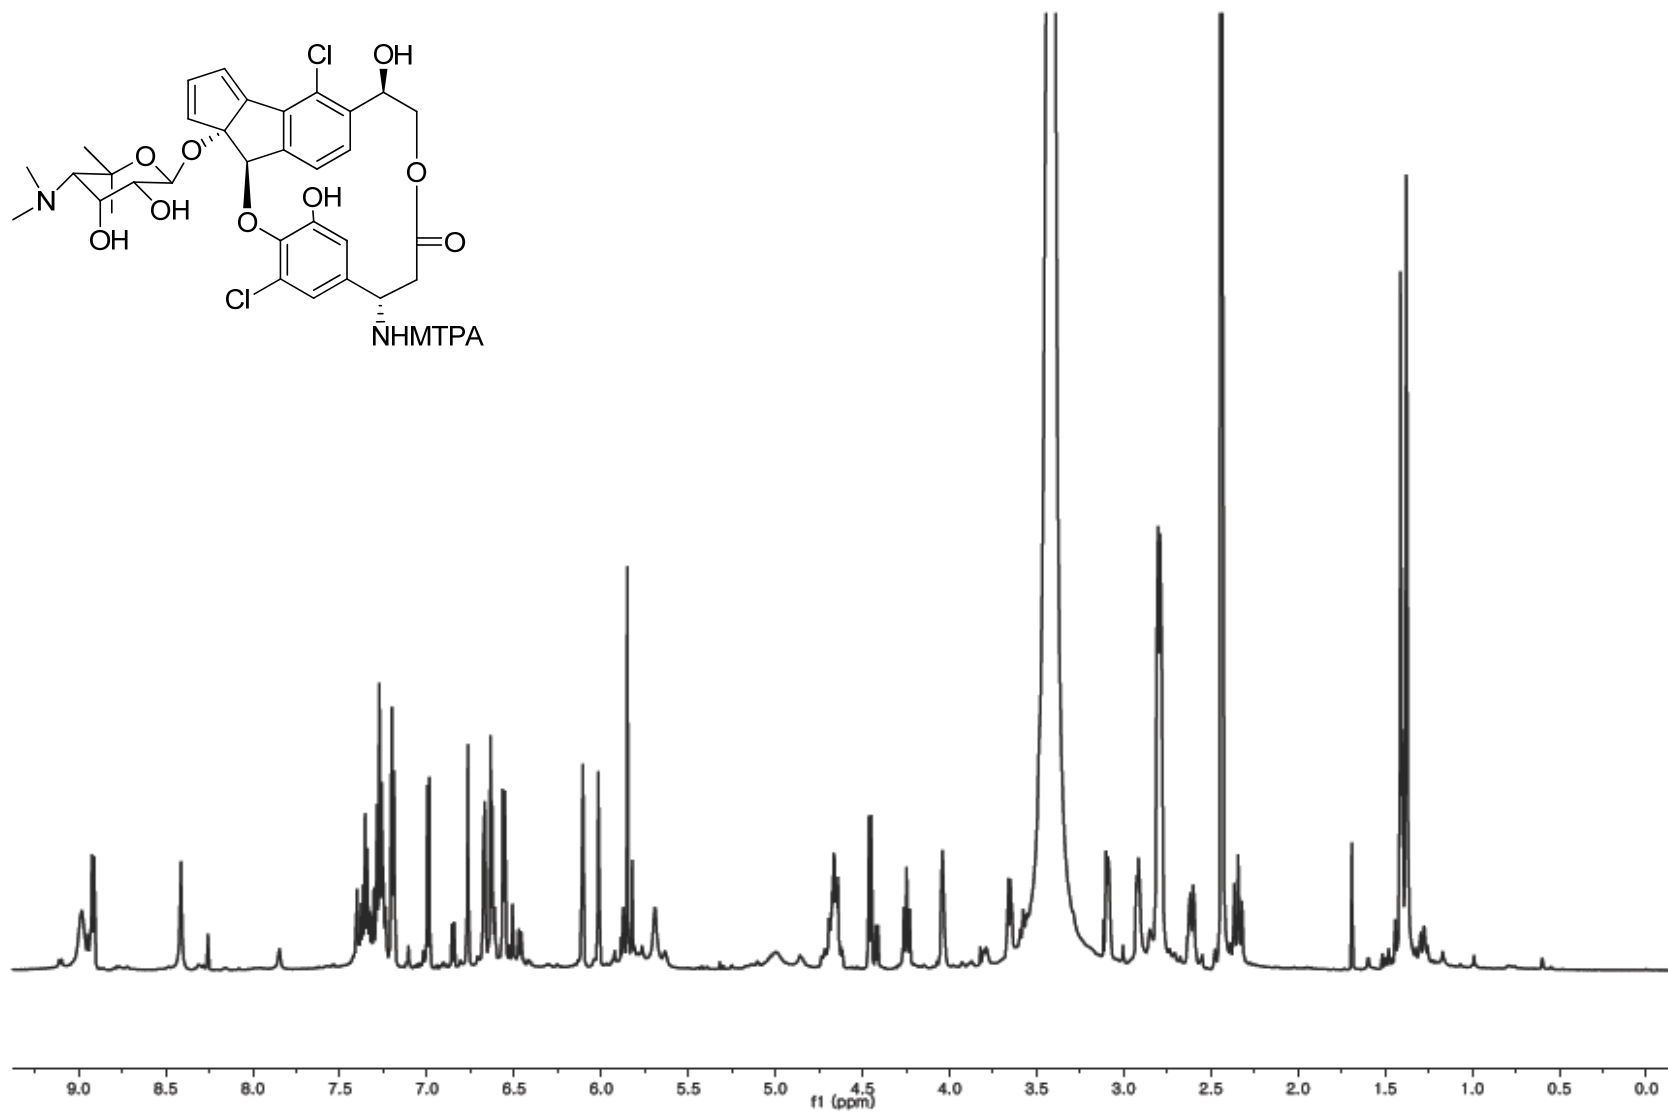

**Figure S12.**  $^1\text{H}$  NMR Spectrum (500 MHz) for Acetonide (**5**) in methanol- $d_4$

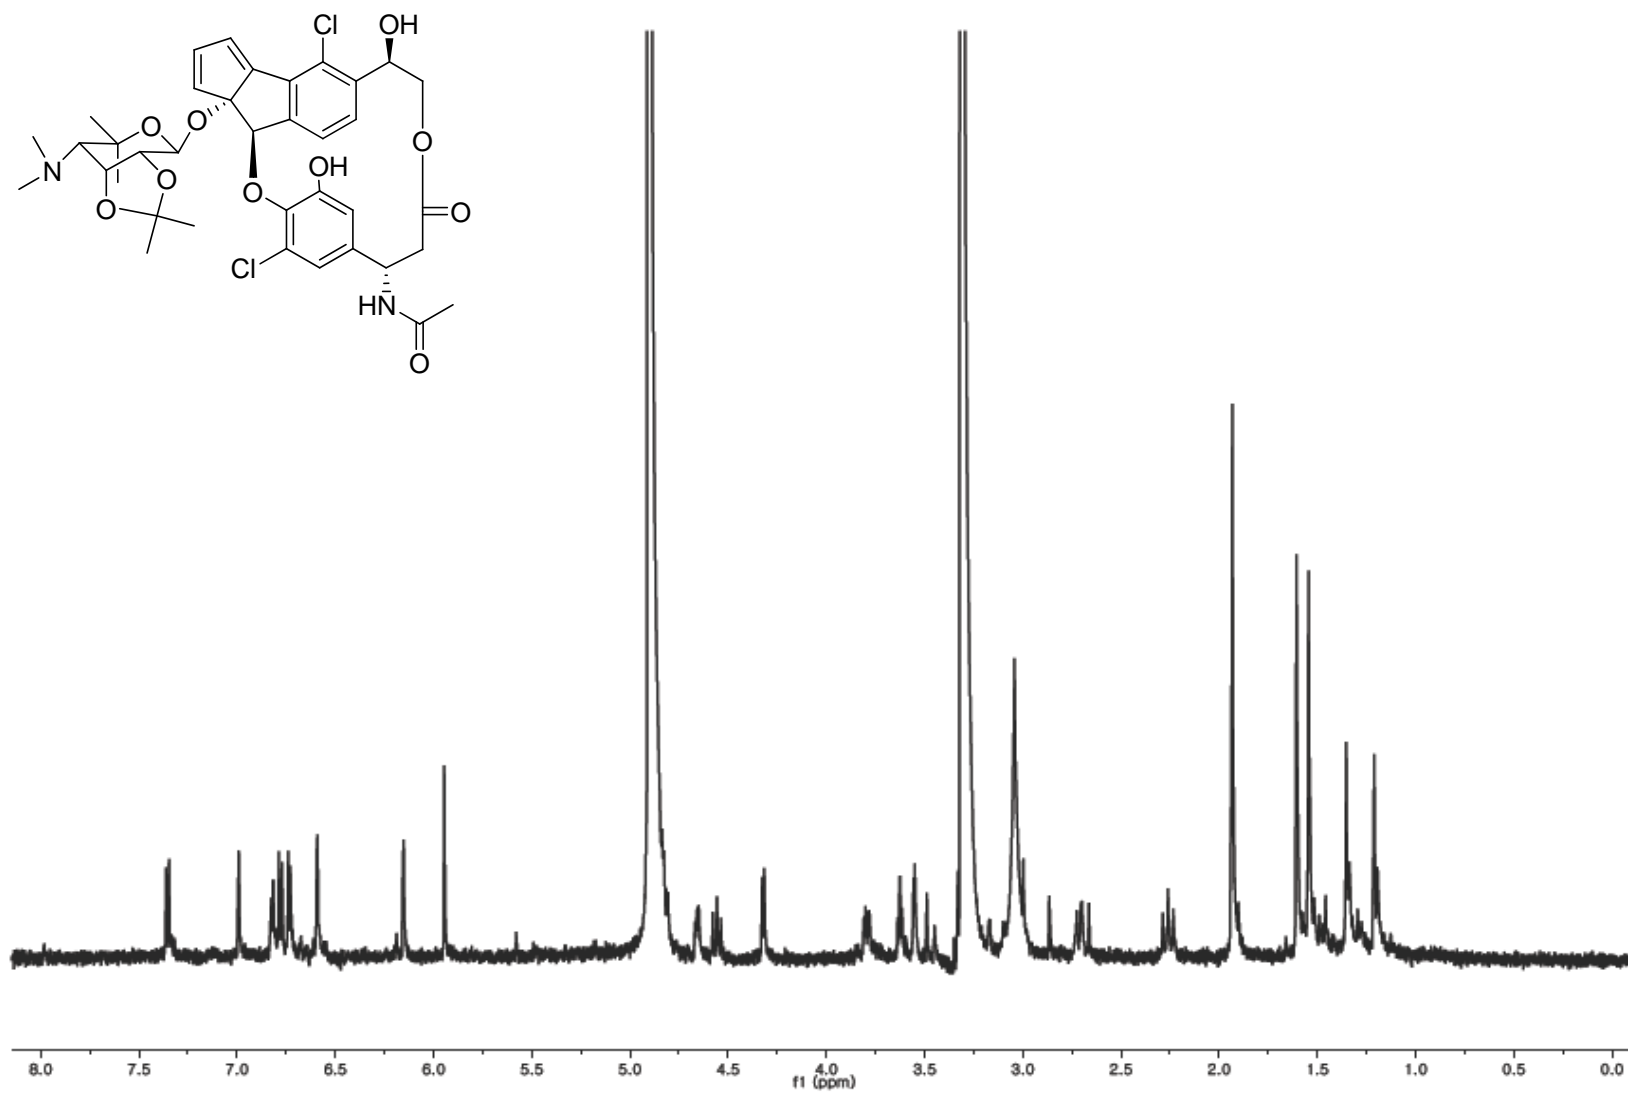

**Figure S13.**  $^1\text{H}$  NMR Spectrum (600 MHz) for *S*-MTPA ester (**6a**) of Acetonide in  $\text{CDCl}_3$

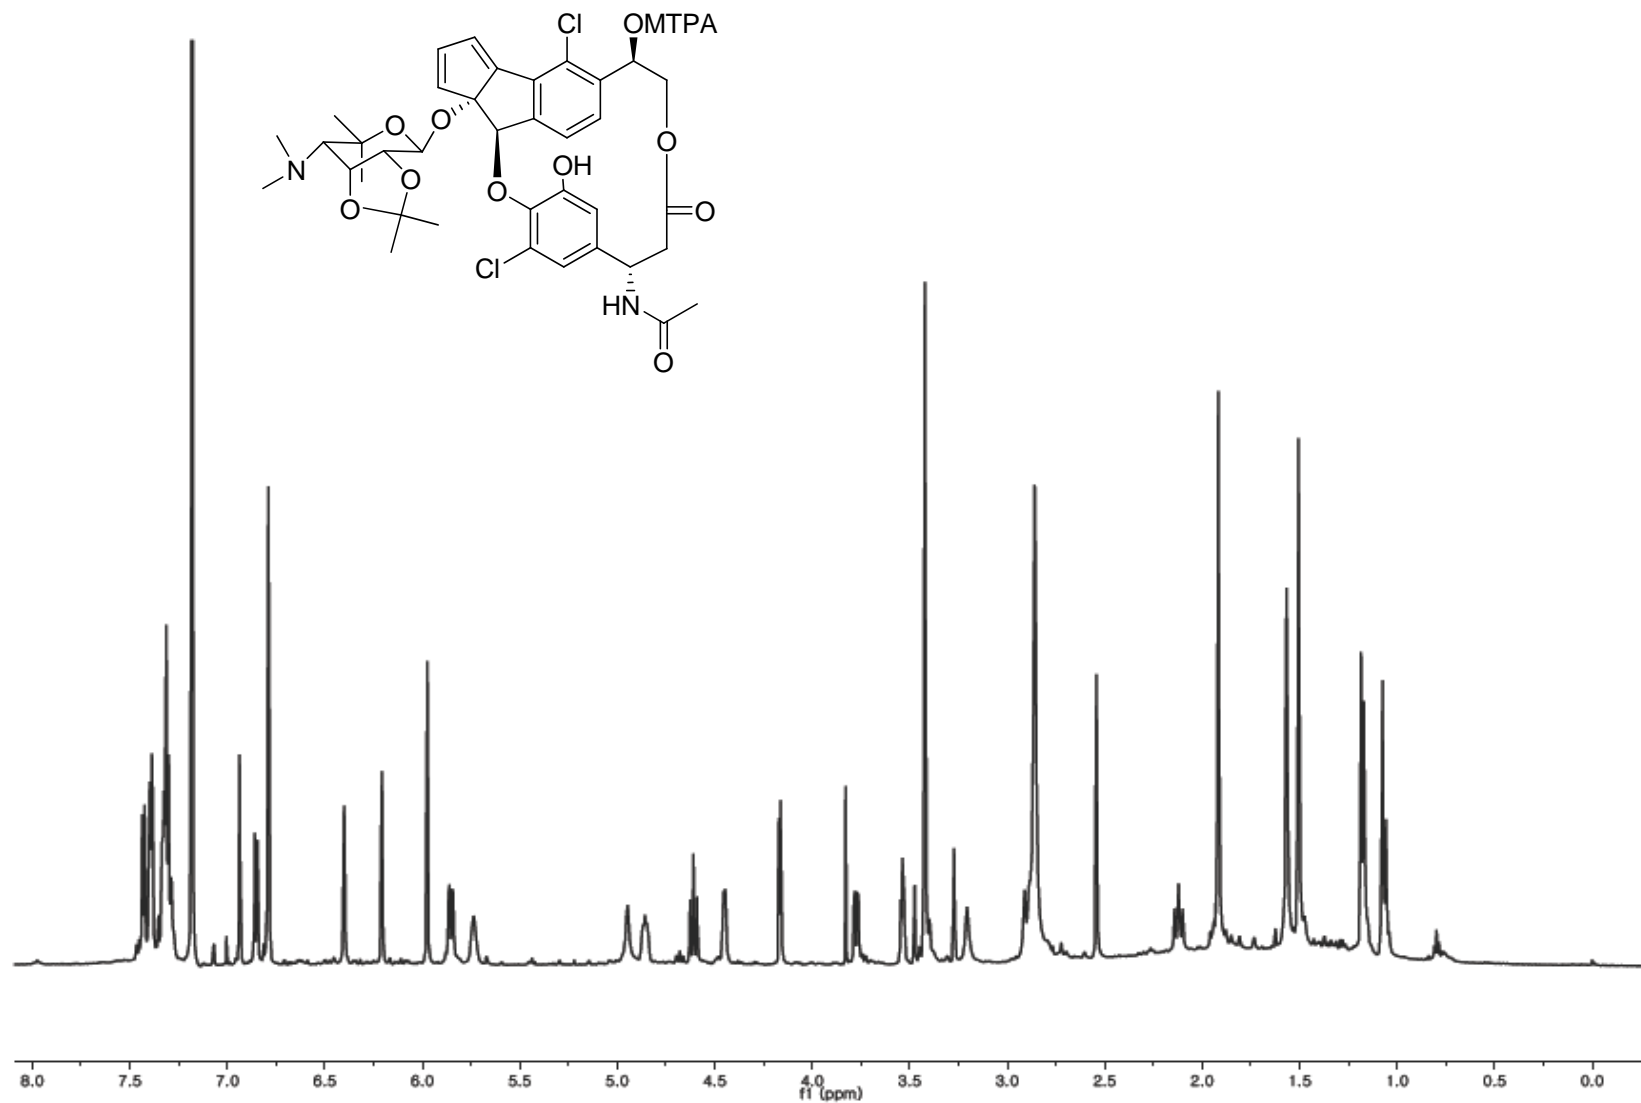

**Figure S14.**  $^1\text{H}$  NMR Spectrum (600 MHz) for *R*-MTPA ester (**6b**) of Acetonide in  $\text{CDCl}_3$

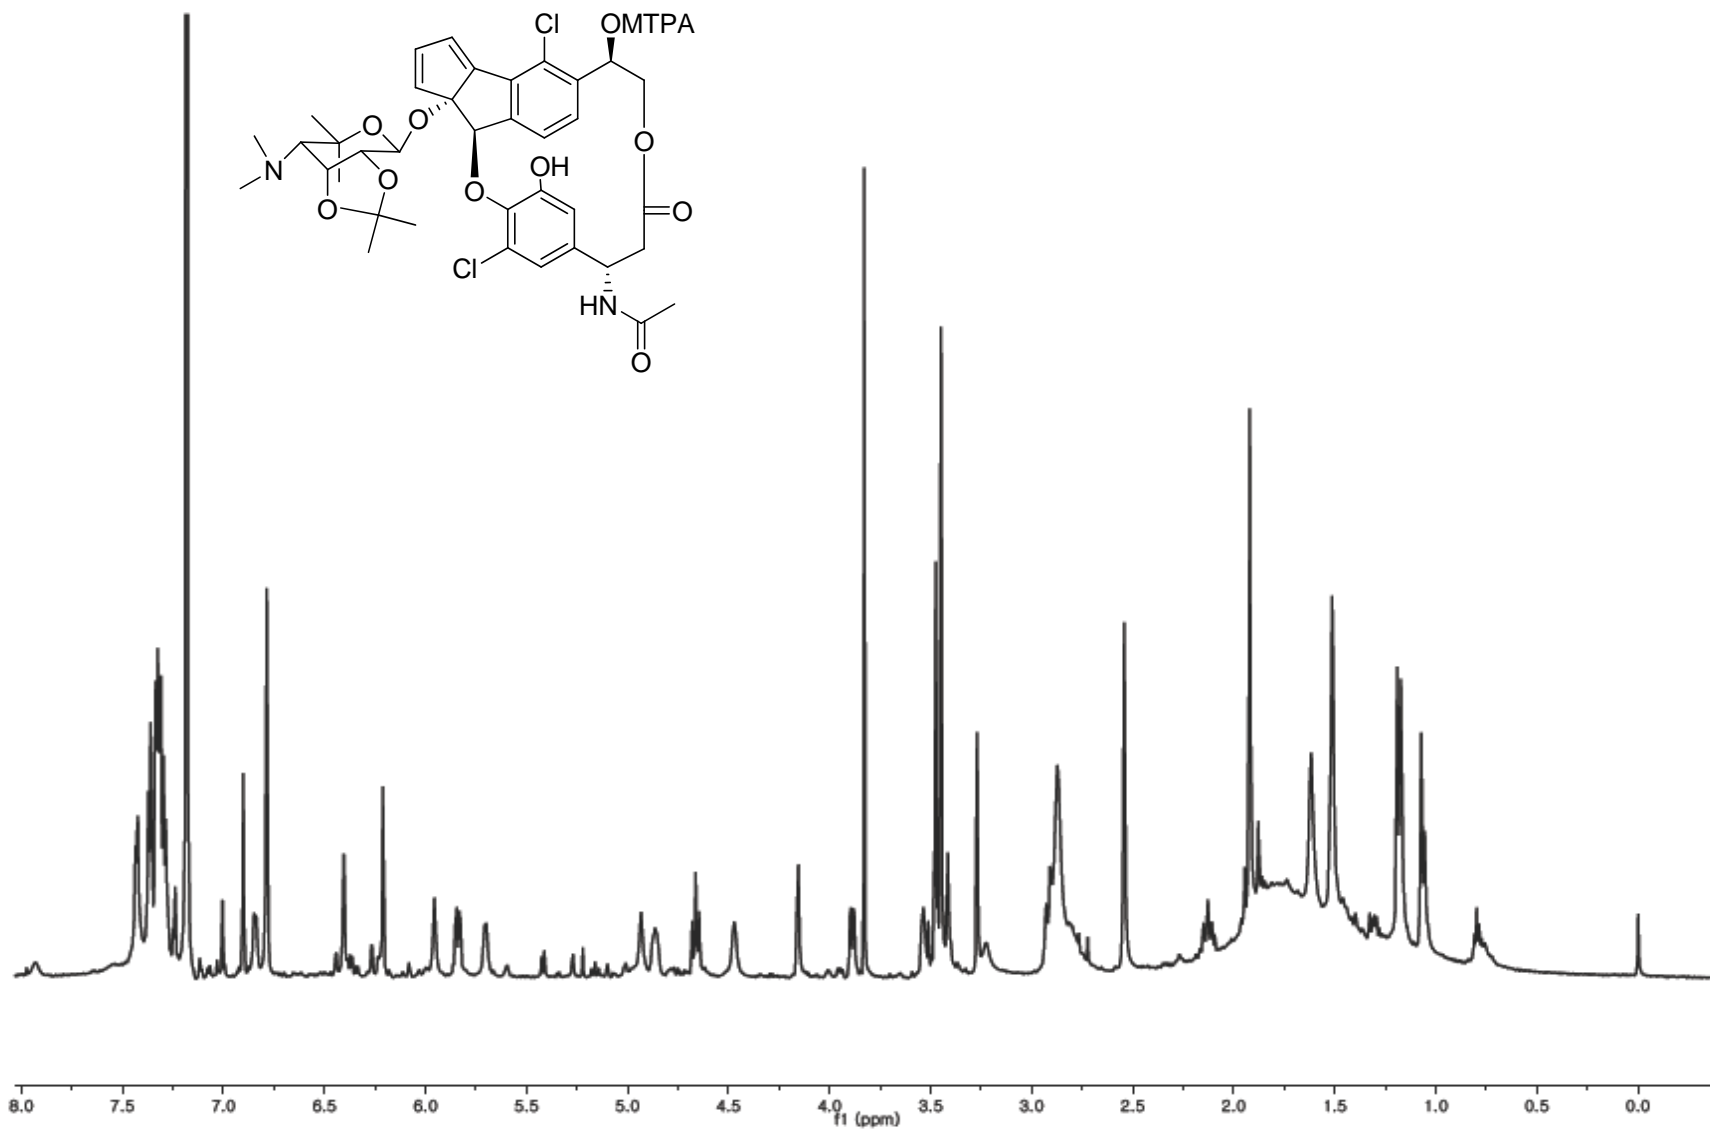

Supplement: NIHMS207343-supplement-1_si_001.pdf [file NIHMS207343-supplement-1_si_001.pdf]
